# Supplementary material
Source: HighWire-hosted journal article supplement (https://www.jpn.ca/highwire/filestream/89796/field_highwire_adjunct_files/0/jpn-120029-1-at.pdf)
Supplement: jpn-120029-1-at.pdf [file jpn-120029-1-at.pdf]

DOI: 10.1503/jpn.120029

Copyright © 2012 The Author(s) or their employer(s). To receive this resource in an accessible format, please contact us at [cmajgroup@cmaj.ca](mailto:cmajgroup@cmaj.ca).

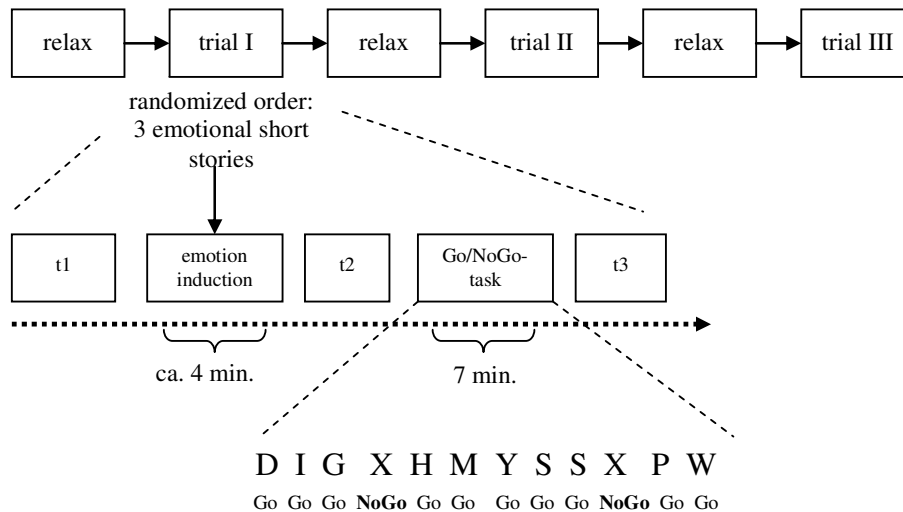

**Fig. S1:** Experimental procedure. t1, t2, t3: emotion ratings.

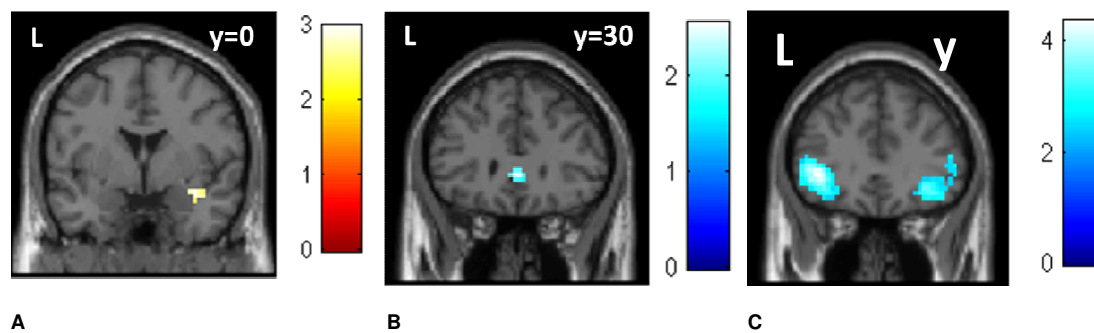

**Fig. S2:** Group differences during and after anger induction versus joy mood induction. **(A)** Trend for stronger activation of the right amygdala ( $p_{FWE} = 0.07$ ; the left amygdala showed a weak trend: SVC  $p_{FWE} = 0.15$ ) in 17 patients with borderline personality disorder (BPD) compared to 18 healthy controls when participants listened to an anger-inducing story compared to a joy/neutral story. Colour bars indicate  $t$  values. **(B)** Trend for stronger activation of the subgenual anterior cingulate (SVC  $p_{FWE} = 0.11$ ) in 18 healthy controls compared to 17 patients with BPD when participants listened to an anger-inducing story compared to a joy/neutral story. **(C)** Reduced left inferior frontal cortex activation (SVC  $p_{FWE} = 0.003$ ) in 17 patients with BPD compared to 18 healthy controls during go/no-go blocks after an anger condition compared to a joy condition. FWE = family-wise error; SVC = small volume correction.

**Appendix 1** to Jacob GA, Zvonik K, Kamphausen S, et al. Emotional modulation of motor response inhibition in women with borderline personality disorder: an fMRI study. *J Psychiatry Neurosci* 2012.

DOI: 10.1503/jpn.120029

**Table S1: Brain activation during the go/no-go task, independent of emotional context, in 17 patients with borderline personality disorder and 18 healthy controls**

| Region                                 | MNI coordinate |          |          | z value | Voxel-level <i>p</i> value, uncorrected | Voxel-level <i>p</i> value, FWE-corrected | Cluster size in voxels |
|----------------------------------------|----------------|----------|----------|---------|-----------------------------------------|-------------------------------------------|------------------------|
|                                        | <i>x</i>       | <i>y</i> | <i>z</i> |         |                                         |                                           |                        |
| <b>Controls</b>                        |                |          |          |         |                                         |                                           |                        |
| Middle frontal/inferior frontal cortex | 45             | 39       | 24       | 5.79    | < 0.001                                 | < 0.001                                   | 1709                   |
| Parietal cortex                        | 45             | -39      | 45       | 5.55    | < 0.001                                 | < 0.001                                   | 844                    |
| Insula                                 | -36            | 18       | 3        | 5.36    | < 0.001                                 | 0.001                                     | 304                    |
| <b>BPD</b>                             |                |          |          |         |                                         |                                           |                        |
| Middle frontal/inferior frontal cortex | 33             | 54       | 21       | 4.51    | < 0.001                                 | 0.035                                     | 130                    |
| Parietal cortex                        | 60             | -42      | 24       | 5.54    | < 0.001                                 | < 0.001                                   | 826                    |
| Insula                                 | 36             | 21       | -3       | 4.71    | < 0.001                                 | 0.015                                     | 290                    |

BPD = borderline personality disorder; FWE = family-wise error.
